# Supplementary material for: RNase MRP RNA and RNase P activity in plants are associated with a Pop1p containing complex
Source: PubMed Central journal article supplement — Nucleic Acids Res. 2012 May 25;40(16):7956–66. doi: 10.1093/nar/gks476 (PMC3439889; doi:10.1093/nar/gks476), 2012-05-25
Supplement: supp_gks476_nar-02633-r-2011-File009.pdf [file supp_gks476_nar-02633-r-2011-File009.pdf]

## Supplementary sequence information (Krehan et al., RNase MRP RNA ...)

### Accessory sequence alignment: Analysis of AtPop1 mRNAs by RACE

```

      510      520      530      540      550      560      570      580      590      600
.....|.....|.....|.....|.....|.....|.....|.....|.....|.....|.....|.....|.....|.....|.....|.....|
Gene-----Intron1-----UAG1-----Exon2-----
NC003071.7 GTTAAGAGTCTTTTGAATCTTAAGGTTGTTTTTGTTCATGGTTCTAGAGGAAGGGGATCTAGGGATGTCTTGAAGCAGTCTCGGCAAGGTGTTCTTGTTTC
AT2G47300.2 -----AGGAAGGGGATCTAGGGATGTCTTGAAGCAGTCTCGGCAAGGTGTTCTTGTTTC
AT2G47300.3 -----GAAGGGGATCTAGGGATGTCTTGAAGCAGTCTCGGCAAGGTGTTCTTGTTTC
Clone 20 -----gaattcgcaccttaggaaggggatctagggATGTCTTGAAGCAGTCTCGGCAAGGTGTTCTTGTTTC
Clone 22 -----gaattcgcaccttaggaaggggatctagggATGTCTTGAAGCAGTCTCGGCAAGGTGTTCTTGTTTC
Clone 24 -----gaattcgcaccttaggaaggggatctagggATGTCTTGAAGCAGTCTCGGCAAGGTGTTCTTGTTTC
Clone 25 -----gaattcgcaccttaggaaggggatctagggATGTCTTGAAGCAGTCTCGGCAAGGTGTTCTTGTTTC
Primer >>>>>POP1-3'ss>>>>

      610      620      630      640      650      660      670      680      690      700
.....|.....|.....|.....|.....|.....|.....|.....|.....|.....|.....|.....|.....|.....|.....|.....|
Gene AUG2-----Exon2-----UGA1-----Intron2-----
NC003071.7 ATGATGCAAGCTATCACATTGCTGTGCAATTGGAGGGTCCAGAGGCAGGCATTACACTTATTCTTGATATCCTTCTATAAGTTTTTTTCAACTTGTTTG
AT2G47300.2 ATGATGCAAGCTATCACATTGCTGTGCAATTGGAGGGTCCAGAG-----
AT2G47300.3 ATGATGCAAGCTATCACATTGCTGTGCAATTGGAGGGTCCAGAGCAG-----
Clone 20 ATGATGCAAGCTATCACATTGCTGTGCAATTGGAGGGTCCAGAG-----
Clone 22 ATGATGCAAGCTATCACATTGCTGTGCAATTGGAGGGTCCAGAG-----
Clone 24 ATGATGCAAGCTATCACATTGCTGTGCAATTGGAGGGTCCAGAG-----
Clone 25 ATGATGCAAGCTATCACATTGCTGTGCAATTGGAGGGTCCAGAG-----

      710      720      730      740      750      760      770      780      790      800
.....|.....|.....|.....|.....|.....|.....|.....|.....|.....|.....|.....|.....|.....|.....|.....|
Gene-----Exon3-----
NC003071.7 TGTGTTTCATATTTTCTTCATGTCTTTTGGCTTTGAATTTCTCAGGGCTCACTCTTATCGATATTAATATGCTACTAGAGCCTTCTCCGTCATCTCATTTC
AT2G47300.2 -----GGCTCACTCTTATCGATATTAATATGCTACTAGAGCCTTCTCCGTCATCTCATTTC
AT2G47300.3 -----GGCTCACTCTTATCGATATTAATATGCTACTAGAGCCTTCTCCGTCATCTCATTTC
Clone 20 -----GGCTCACTCTTATCGATATTAATATGCTACTAGAGCCTTCTCCGTCATCTCATTTC
Clone 22 -----GGCTCACTCTTATCGATATTAATATGCTACTAGAGCCTTCTCCGTCATCTCATTTC
Clone 24 -----GGCTCACTCTTATCGATATTAATATGCTACTAGAGCCTTCTCCGTCATCTCATTTC
Clone 25 -----GGCTCACTCTTATCGATATTAATATGCTACTAGAGCCTTCTCCGTCATCTCATTTC
Primer >>>>>>POP1-GSP3F>>>>>>

```

```

      810      820      830      840      850      860      870      880      890      900
.....|.....|.....|.....|.....|.....|.....|.....|.....|.....|.....|.....|.....|.....|.....|.....|
Gene -----Exon3-----Intron3-----
NC003071.7 GAAGGAAGTTTTTCGACTCTATTCTCACTGGCGGTAGTTATGAAAACGCCATGGTATAGTGAATTTATGAATTCATTTAATAGGAATCAAGACGATAACTT
AT2G47300.2 GAAGGAAGTTTTTCGACTCTATTCTCACTGGCGGTAGTTATGAAAACGCCATG-----
AT2G47300.3 GAAGGAAGTTTTTCGACTCTATTCTCACTGGCGGTAGTTATGAAAACGCCATG-----
Clone 20 GAAGGAAGTTTTTCGACTCTATTCTCACTGGCGGTAGTTATGAAAACGCCATG-----
Clone 22 GAAGGAAGTTTTTCGACTCCATTCTCACTGGCGGTAGTTATGAAAACGCCATG-----
Clone 24 GAAGGAAGTTTTTCGACTCTATTCTCACTGGCGGTAGTTATGAAAACGCCATG-----
Clone 25 GAAGGAAGTTTTTCGACTCTATTCTCACTGGCCGTAGTTATGAAAACGCCATG-----

```

```

      910      920      930      940      950      960      970      980      990      1000
.....|.....|.....|.....|.....|.....|.....|.....|.....|.....|.....|.....|.....|.....|.....|.....|
Gene -----Intron3-----Exon4+4a-----
NC003071.7 TAGAATGATGTAACCGCAAGTTGTTTGTCTTTCAGCTTTATCATGTGCGAACCACCAGTTTCTCAGGCGATTGCTCCTGTTACTTATATGTGGAGACCT
AT2G47300.2 -----CTTTATCATGTGCGAACCACCAGTTTCTCAGGCGATTGCTCCTGTTACTTATATGTGGAGACCT
AT2G47300.3 -----CTTTATCATGTGCGAACCACCAGTTTCTCAGGCGATTGCTCCTGTTACTTATATGTGGAGACCT
Clone 20 -----CTTTATCATGTGCGAACCACCAGTTTCTCAGGCGATTGCTCCTGTTACTTATATGTGGAGACCT
Clone 22 -----CTTTATCATGTGCGAACCACCAGTTTCTCAGGCGATTGCTCCTGTTACTTATATGTGGAGACCT
Clone 24 -----CTTTATCATGTGCGAACCACCAGTTTCTCAGGCGATTGCTCCTGTTACTTATATGTGGAGACCT
Clone 25 -----CTTTATCATGTGCGAACCACCAGTTTCTCAGGCGATTGCTCCTGTTACTTATATGTGGAGACCT

```

```

      1010      1020      1030      1040      1050      1060      1070      1080      1090      1100
.....|.....|.....|.....|.....|.....|.....|.....|.....|.....|.....|.....|.....|.....|.....|.....|
Gene -----Exon4+4a-----FUE-----
NC003071.7 TCTAAGATAACCAAAGAGAAGAAATGAGGAGAAAGGGGGTGACGGCATAGGAACTGATCTCCCAGTCTCAGATAAAGATCATGAAGACTTTTCGTAAACTTT
AT2G47300.2 TCTAAGATAACCAAAGAGAAGAAATGAGGAGAAAGGGGGTGACGGCATAGGAACTGATCTCCCAGTCTCAGATAAAGATCATGAAGACTTTTCGTAAACTTT
AT2G47300.3 TCTAAGATAACCAAAGAGAAGAAATGAGGAGAAAGGGGGTGACGGCATAGGAACTGATCTCCCAGTCTCAGATAAAGATCATGAAGACTTTTCGTAAACTTT
Clone 20 TCTAAGATAACCAAAGAGAAGAAATGAGGAGAAAGGGGGTGACGGCATAGGAACTGATCTCCCAGTCTCAGATAAAGATCATGAAGACTTTTCGTAAACTTT
Clone 22 TCTAAGATAACCAAAGAGAAGAAATGAGGAGAAAGGGGGTGACGGCATAGGAACTGATCTCCCAGTCTCAGATAAAGATCATGAAGACTTTTCGTAAACTTT
Clone 24 TCTAAGATAACCAAAGAGAAGAAATGAGGAGAAAGGGGGTGACGGCATAGGAACTGATCTCCCAGTCTCAGATAAAGATCATGAAGACTTTTCGTAAACTTT
Clone 25 TCTAAGATAACCAAAGAGAAGAAATGAGGAGAAAGGGGGTGACGGCATAGGAACTGATCTCCCAGTCTCAGATAAAGATCATGAAGACTTTTCGTAAACTTT

```

```

      1110      1120      1130      1140      1150      1160      1170      1180      1190      1200
.....|.....|.....|.....|.....|.....|.....|.....|.....|.....|.....|.....|.....|.....|.....|.....|
Gene -----Exon4+4a-----Intron4/Exon4a-----
NC003071.7 GGGTGTGGATCCATGCTTCTTCCTTCAGTGAAGGATATGCTATTCTTAAAGTAGCTTGTGAGAAACAGGTAGCTATTTGTTGTCTTTTGAGGTTATTTTT
AT2G47300.2 GGGTGTGGATCCATGCTTCTTCCTTCAGTGAAGGATATGCTATTCTTAAAGTAGCTTGTGAGAAACAG-----
AT2G47300.3 GGGTGTGGATCCATGCTTCTTCCTTCAGTGAAGGATATGCTATTCTTAAAGTAGCTTGTGAGAAACAG-----
Clone 20 GGGTGTGGATCCATGCTTCTTCCTTCAGTGAAGGATATGCTATTCTTAAAGTAGCTTGTGAGAAACAGGTAGCTATTTGTTGTCTTTTGAGGTTATTTCTT
Clone 22 GGGTGTGGATCCATGCTTCTTCCTTCAGTGAAGGATATGCTATTCTTAAAGTAGCTTGTGAGAAACAGGTAGCTATTTGTTGTCTTTTGAGGTTATTTCTT
Clone 24 GGGTGTGGATCCATGCTTCTTCCTTCAGTGAAGGATATGCTATTCTTAAAGTAGCTTGTGAGAAACAGGTAGCTATTTGTTGTCTTTTGAGGTTATTTTT
Clone 25 GGGTGTGGATCCATGCTTCTTCCTTCAGTGAAGGATATGCTATTCTTAAAGTAGCTTGTGAGAAACAGGTAGCTATTTGTTGTCTTTTGAGGTTATTTTT

```



**Methods:**

The 3' termini of AtPop1 mRNAs *in vivo* were identified by RACE, using nested PCR of cDNAs primed with dT<sub>16</sub>V as described in the main text. Four independent clones were sequenced completely from both strands, using the universal M13 forward and reverse primers and the internal GSP3F primer. No attempts were made to experimentally verify the annotated long mRNA variants 2a and 2b, because they are supported by plenty of EST data (82 independent entries in TAIR).

**Results:**

All clones representing the novel AtPop1 mRNA variant 3 extend into the annotated intron 4, thus creating exon 4a. The contiguous reading frame is closed by an in-frame stop codon (UGA<sub>2</sub>) at position 1202 within this region. The polyadenylation signals for this mRNA are located at positions 1088-1217 (FUE), 1245-1250 (NUE) and 1268 (CS) and conform to the consensus suggested by Loke et al. (2005). An oligo T-stretch which may facilitate transcription termination (52) is present at the distal end of intron 5. The complete sequence of mRNA variant 3 (FN673552) was assembled from several 3' and 5' RACE clones as described in the main text and is shown in supplementary figure 1, together with variants 1, 2a and 2b (corresponding to AT2G47300.1, 2 and 3).

**Discussion:**

The novel mRNA 3 is created by retention of intron 4, which provides an in-frame stop codon for the ORF starting at AUG1. The RNA terminates close to the annotated 3' splice site and shows all signals required for 3' end processing: the CS at position 1268 is embedded in a cleavage element and preceded by a FUE and NUE. These signals show good agreement to the polyadenylation signal consensus, which is not strictly defined in plant mRNAs (50). All clones are polyadenylated at the same site, indicating that this mRNA is correctly processed *in vivo*.

The 3' termini of the published long mRNA variants 2a and 2b have been defined at a single cleavage/polyadenylation site (see supplementary figure 1, position 3510). However, examination of published ESTs revealed that three additional upstream polyadenylation sites are used at approximately equal distribution (2 or 3 clones/site), as is frequently found in plant mRNAs. Transcription termination may be facilitated by the T-rich regions starting at positions 3351 and 3468.

Of the over 80 independent ESTs analysed, 9 extend to the 3' end within exon 10. The exclusive presence of the long mRNAs in EST databases (TAIR) may be due to these multiple polyadenylation sites; in addition, the genomic sequence immediately downstream of the most distal (and only annotated) poly(A) site contains several A-stretches, which may have led to amplification of partially processed mRNAs and thus to a bias in EST synthesis. Taken together, these points may explain the lack of EST data for the novel mRNA 3.

**References:**

50. Loke, J.C., Stahlberg, E.A., Strenski, D.G., Haas, B.J., Wood, P.C. and Li, Q.Q. (2005) Compilation of mRNA Polyadenylation Signals in Arabidopsis Revealed a New Signal Element and Potential Secondary Structures. *Plant Physiol.* **138**, 1457–1468.
52. Hasegawa, K., Yukawa, Y. and Sugiura, M. (2003) *In vitro* analysis of transcription initiation and termination from the Lhcb1 gene family in *Nicotiana glauca*: detection of transcription termination sites. *Plant J.* **33**, 1063–1072.
